# Supplementary material for: Integrated Information on the Structure and Composition of the Ostrich Eggshell (Struthio camelus)
Source: MDPI journal article supplement (doi:10.3390/min13040481), 2023-03-29
Supplement: s1 [file s1]

Archive with 1 entries (1 files):
- minerals-2260948-supplementary.pdf
